# Supplementary material
Source: PubMed Central journal article supplement (PMC3554090)
Supplement: JVI.02329-12_zjv999097126so1.pdf [file JVI.02329-12_zjv999097126so1.pdf]

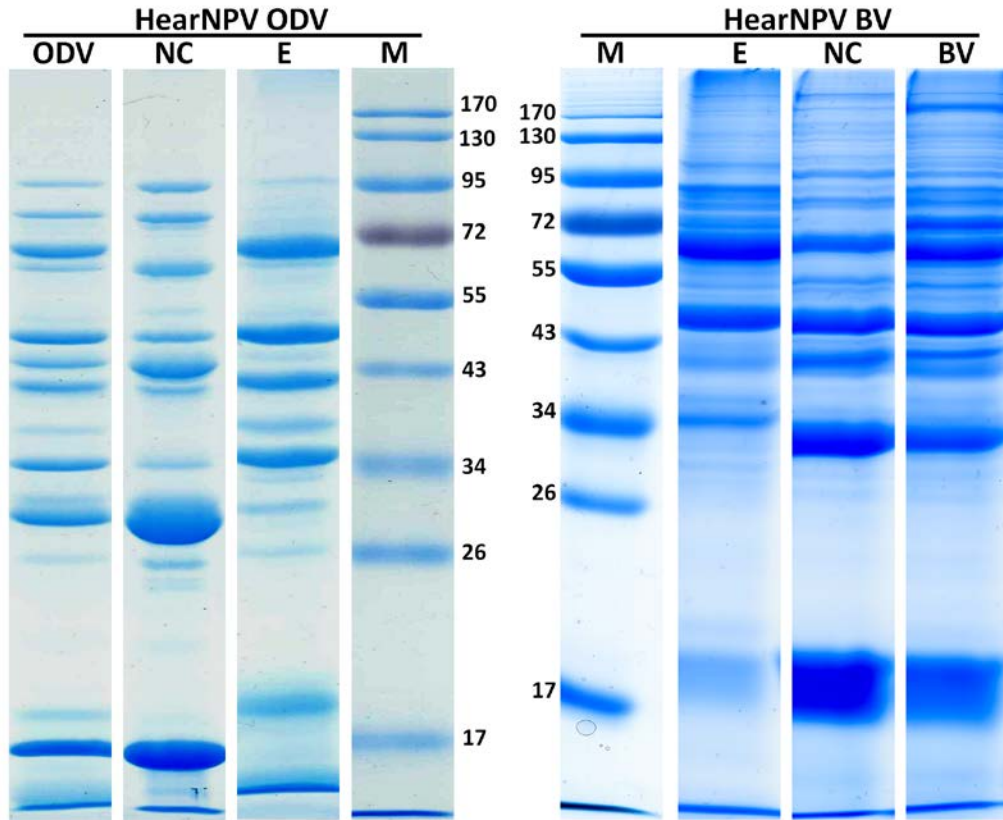

**Fig. S1. SDS-PAGE profile of purified HearNPV BV and ODV virions and their nucleocapsid (NC) and envelope (E) fractions.** The proteins were separated by 12% SDS-PAGE and stained with colloidal blue. M: molecular mass markers.

**Table S1. Statistical analysis of iTRAQ peptide data for protein localization.**

**A. Quantification results of HearNPV BV proteins.**

| No. | Protein   | Experiment 1 |            |            |                | Experiment 2 |            |            |                | Inferred location |
|-----|-----------|--------------|------------|------------|----------------|--------------|------------|------------|----------------|-------------------|
|     |           | LR Avg       | LR LowerCI | LR UpperCI | No of Peptides | LR Avg       | LR LowerCI | LR UpperCI | No of Peptides |                   |
| 1   | E25       | 1.49537      | 1.17728    | 1.7472     | 8              | 1.44542      | 1.13659    | 1.56188    | 7              | E                 |
| 2   | ChiA      | 1.70856      | 1.53679    | 1.84904    | 8              | 1.03567      | 0.71337    | 1.3188     | 6              | E                 |
| 3   | V-Ubi     | 1.21507      | 0.99328    | 1.52787    | 4              |              |            |            |                | E                 |
| 4   | HA68      | 1.26153      | 0.69146    | 1.43046    | 4              | 0.76373      | -0.30056   | 1.23216    | 5              | E                 |
| 5   | F protein | 0.92444      | 0.79514    | 1.01425    | 78             | 0.91334      | 0.82477    | 0.99888    | 49             | E                 |
| 6   | P48       | 0.3372       | -0.04162   | 1.37165    | 4              | -0.02363     | -0.1125    | 0.13278    | 3              | EC                |
| 7   | HA69      | -0.33377     | -0.41411   | 0.0041     | 3              |              |            |            |                | EC                |
| 8   | GP41      | -0.34426     | -0.44439   | -0.17618   | 3              |              |            |            |                | EC                |
| 9   | HA128     | -0.40313     | -0.68181   | -0.23449   | 14             | -0.37757     | -0.56988   | -0.0073    | 20             | EC                |
| 10  | P10       | -0.73837     | -0.9527    | -0.59761   | 5              | -0.5816      | -0.75257   | -0.33666   | 6              | EC                |
| 11  | PKIP      | -0.6628      | -0.72324   | -0.56512   | 3              |              |            |            |                | EC                |
| 12  | P78/83    |              |            |            |                | -0.81364     | -0.83473   | -0.78392   | 4              | NC                |
| 13  | P26       | -0.83577     | -0.9717    | -0.69705   | 9              | -0.84224     | -1.14827   | -0.53764   | 8              | NC                |
| 14  | VP80      | -0.86186     | -1.45579   | -0.48798   | 4              |              |            |            |                | NC                |
| 15  | HA57      | -1.0924      | -1.51794   | -0.70293   | 4              |              |            |            |                | NC                |
| 16  | HA9       | -1.27774     | -1.56091   | -0.99169   | 4              |              |            |            |                | NC                |
| 17  | HA44      | -1.51035     | -1.75727   | -1.22077   | 15             | -1.42146     | -1.72972   | -1.12716   | 13             | NC                |
| 18  | HA66      | -1.65882     | -2.1651    | -1.09044   | 7              | -1.35932     | -2.23847   | -0.34476   | 7              | NC                |
| 19  | FGF       | -1.38133     | -1.50275   | -1.20764   | 25             | -1.68295     | -1.80585   | -1.4219    | 23             | NC                |
| 20  | POLH      | -1.58207     | -1.94877   | -1.25649   | 4              | -1.58146     | -1.94335   | -1.22651   | 5              | NC                |

|    |      |          |          |          |    |          |          |          |    |    |
|----|------|----------|----------|----------|----|----------|----------|----------|----|----|
| 21 | PK-1 | -1.73667 | -2.18207 | -1.3323  | 3  | -1.61204 | -2.444   | -1.10567 | 3  | NC |
| 22 | P12  | -1.72656 | -2.55831 | -1.10572 | 3  |          |          |          |    | NC |
| 23 | ME53 | -1.87674 | -2.13486 | -1.65591 | 18 | -1.67308 | -2.00452 | -1.16442 | 15 | NC |
| 24 | C42  | -1.64107 | -2.78671 | -0.80466 | 3  | -2.57507 | -3.36275 | -1.9252  | 3  | NC |
| 25 | VP39 | -1.98823 | -2.22964 | -1.75273 | 64 | -2.32096 | -2.7304  | -1.87506 | 39 | NC |
| 26 | PEP  | -2.62718 | -3.43899 | -1.49213 | 5  |          |          |          |    | NC |

### B. Quantification results of HearNPV ODV proteins.

|    | Protein | Experiment 1 |            |            |                | Experiment 2 |            |            |                | Inferred location |
|----|---------|--------------|------------|------------|----------------|--------------|------------|------------|----------------|-------------------|
|    |         | LR Avg       | LR LowerCI | LR UpperCI | No of Peptides | LR Avg       | LR LowerCI | LR UpperCI | No of Peptides |                   |
| 1  | HA72    | 2.2924       | 1.9555     | 2.8749     | 3              |              |            |            |                | E                 |
| 2  | E25     | 1.707        | 1.3508     | 2.0826     | 13             | 2.4594       | 2.0516     | 2.739      | 11             | E                 |
| 3  | E66     | 2.1209       | 1.888      | 2.3728     | 41             | 2.0145       | 1.6125     | 2.3788     | 47             | E                 |
| 4  | GP41    | 2.0107       | 1.9185     | 2.0934     | 672            | 2.0433       | 1.9581     | 2.1151     | 751            | E                 |
| 5  | HA95    | 2.0136       | 1.5008     | 2.8468     | 3              |              |            |            |                | E                 |
| 6  | P33     | 1.8409       | 1.4811     | 2.164      | 12             | 2.0856       | 1.8029     | 2.3727     | 12             | E                 |
| 7  | SOD     | 2.0578       | 1.4688     | 2.6676     | 4              | 1.8336       | 1.6686     | 2.0261     | 5              | E                 |
| 8  | HA9     | 2.0395       | 1.9798     | 2.0874     | 780            | 1.7786       | 1.7164     | 1.8314     | 803            | E                 |
| 9  | P74     | 1.9521       | 1.7399     | 2.2202     | 17             | 1.6949       | 1.1848     | 2.1561     | 12             | E                 |
| 10 | PIF6    | 1.7353       | 1.4368     | 2.187      | 4              | 1.7218       | 1.1936     | 2.2157     | 5              | E                 |
| 11 | EC43    | 1.5928       | 1.4956     | 1.6852     | 261            | 1.704        | 1.6004     | 1.7911     | 395            | E                 |
| 12 | HA69    | 1.3555       | 0.929      | 1.8189     | 4              | 1.931        | 1.5368     | 2.3888     | 4              | E                 |
| 13 | PIF3    | 1.5666       | 1.2848     | 2.451      | 3              | 1.5623       | 1.5019     | 1.6215     | 3              | E                 |
| 14 | VP91    | 1.4854       | 1.3197     | 1.6719     | 31             | 1.3804       | 1.0237     | 1.7046     | 30             | E                 |
| 15 | PIF1    | 1.4014       | 0.9494     | 1.7543     | 11             | 1.4261       | 1.1342     | 1.744      | 13             | E                 |
| 16 | PIF2    | 1.3378       | 1.1312     | 1.5409     | 24             | 1.4111       | 1.2639     | 1.5398     | 18             | E                 |

|    |        |         |         |         |      |         |         |         |      |    |
|----|--------|---------|---------|---------|------|---------|---------|---------|------|----|
| 17 | V-Ubi  | 1.2963  | 1.0764  | 1.6612  | 6    | 1.2157  | 0.9691  | 1.4307  | 10   | E  |
| 18 | PIF5   | 0.6524  | 0.431   | 0.8839  | 71   | 1.0749  | 0.8945  | 1.2653  | 75   | E  |
| 19 | VP80   | 0.7276  | 0.6695  | 0.7797  | 268  | 0.686   | 0.6053  | 0.7479  | 257  | E  |
| 20 | HA100  | 0.4971  | 0.403   | 0.5926  | 61   | 0.5851  | 0.4432  | 0.7034  | 53   | EC |
| 21 | HA13   | 0.1257  | -0.02   | 0.2857  | 4    |         |         |         |      | EC |
| 22 | FP25K  | 0.074   | -0.0178 | 0.1783  | 6    |         |         |         |      | EC |
| 23 | HA66   | -0.0697 | -0.0971 | -0.0438 | 539  | 0.1075  | 0.0781  | 0.1367  | 564  | EC |
| 24 | P78/83 | -0.258  | -0.5114 | 0.001   | 52   | 0.247   | 0.0015  | 0.4395  | 74   | EC |
| 25 | HA43   | -0.0753 | -0.2566 | 0.1605  | 5    |         |         |         |      | EC |
| 26 | HA39   | -0.6125 | -0.8375 | -0.2775 | 7    |         |         |         |      | EC |
| 27 | POHL   | -1.0975 | -1.1672 | -1.0283 | 477  | -0.9902 | -1.0848 | -0.9086 | 436  | NC |
| 28 | VLF-1  | -1.2275 | -1.3917 | -1.0729 | 15   | -0.9501 | -1.0871 | -0.8428 | 14   | NC |
| 29 | HA44   | -1.3642 | -1.4818 | -1.2226 | 356  | -1.0007 | -1.1286 | -0.8534 | 338  | NC |
| 30 | HA52   | -1.2931 | -1.6738 | -0.8612 | 10   | -1.0995 | -1.4519 | -0.7889 | 15   | NC |
| 31 | PEP    | -1.4174 | -1.6268 | -0.9864 | 4    |         |         |         |      | NC |
| 32 | HA90   | -1.8505 | -1.9936 | -1.6382 | 74   | -1.2713 | -1.4595 | -1.0821 | 80   | NC |
| 33 | VP39   | -1.686  | -1.7512 | -1.6171 | 1133 | -1.7315 | -1.7973 | -1.6614 | 1140 | NC |
| 34 | HA45   | -1.6654 | -2.2954 | -1.0744 | 3    | -1.853  | -2.0151 | -1.7285 | 4    | NC |
| 35 | HA51   | -1.8804 | -2.1328 | -1.6298 | 29   | -1.641  | -1.8144 | -1.4222 | 38   | NC |
| 36 | EC27   | -1.779  | -2.2455 | -1.3877 | 19   | -1.9941 | -2.321  | -1.6642 | 15   | NC |
| 37 | C42    | -2.2089 | -2.5534 | -1.9067 | 36   | -1.7283 | -1.9851 | -1.4611 | 34   | NC |
| 38 | VP1054 | -2.5043 | -2.8334 | -2.233  | 7    |         |         |         |      | NC |

LR Avg: log-ratio point estimation, which is weighted average of log-ratio for (E/NC).

LR lowerCI: lower limit of 95% confidence interval for log-ratio estimation.

LR upperCI: upper limit of 95% confidence interval for log-ratio estimation

**Table S2. Host proteins associated with HearNPV BV and ODV.**

**A. Host proteins associated with HearNPV BV.**

| <b>Classification</b>         | <b>Protein</b>                                       | <b>Abbreviation</b> | <b>GI no.</b> | <b>Species</b>          | <b>Other virus(es) reported to contain protein<sup>a</sup></b>                                                               |
|-------------------------------|------------------------------------------------------|---------------------|---------------|-------------------------|------------------------------------------------------------------------------------------------------------------------------|
| Cytoskeleton                  | Actin, cytoplasmic A3a                               | Actin               | gi 3182902    | Helicoverpa armigera    | <b>AcMNPV BV (1), AIHV (2), EBV (3), HCMV (4), HIV (5), HSV (6), IV (7), KSHV (8), MMLV (9), MPV (10), RSV (11), VV (10)</b> |
|                               | Actin-depolymerizing factor 1                        | ADF-1               | gi 95103010   | Bombyx mori             | <b>AcMNPV (1)</b>                                                                                                            |
|                               | Alpha tubulin                                        | $\alpha$ -tubulin   | gi 237636934  | Heliothis virescens     | <b>EBV (3), HCMV (4), HIV (5), IV (7), KSHV (12), RSV (11), VV (13)</b>                                                      |
|                               | Beta tubulin                                         | $\beta$ tubulin     | gi 19773428   | Bombyx mori             | <b>EBV (3), HCMV (4), IV (7), RSV (11), VV (13)</b>                                                                          |
|                               | Abnormal wing disc protein                           | AWD                 | gi 21435082   | Choristoneura parallela |                                                                                                                              |
|                               | Kinesin heavy chain                                  | KHC                 | gi 309384283  | Bombyx mori             |                                                                                                                              |
|                               | Microtubule-associated protein RP/EB family member 3 | MAPRE3              | gi 87248487   | Bombyx mori             |                                                                                                                              |
|                               | Moesin Chain A                                       | Moesin              | gi 122920505  | Spodoptera frugiperda   | <b>EBV (3), HCMV (4), KSHV (8, 12), MMLV (9), MPV (10), RSV (11), VV (10)</b>                                                |
|                               | Myosin II essential light chain                      | Myosin II ELC       | gi 98990267   | Bombyx mori             |                                                                                                                              |
|                               | Profilin                                             | Profilin            | gi 56404766   | Bombyx mori             | <b>HCMV (4), HIV (5), HSV (6), IV (7)</b>                                                                                    |
|                               | Septin                                               | SEPT                | gi 95102582   | Bombyx mori             |                                                                                                                              |
|                               | Thymosin isoform 2                                   | Thymosin            | gi 289900835  | Helicoverpa armigera    | <b>IV (7)</b>                                                                                                                |
| DNA binding                   | Histone H2B-like protein                             | H2b-1               | gi 237648982  | Bombyx mori             | <b>AIHV (2), HIV (5)</b>                                                                                                     |
|                               | Histone H4-like protein                              | H4                  | gi 223972586  | Bombyx mori             | <b>AIHV (2), HIV (5, 14), MMLV (9)</b>                                                                                       |
| Transcription and Translation | Translation initiation factor 2 alpha subunit        | eIF-2 $\alpha$      | gi 27462592   | Spodoptera frugiperda   | <b>EBV (3)</b>                                                                                                               |

|                                               |                |              |                       |                                                          |
|-----------------------------------------------|----------------|--------------|-----------------------|----------------------------------------------------------|
| Elongation factor-1 alpha                     | eEF-1 $\alpha$ | gi 767847    | Helicoverpa armigera  | <b>EBV (3), HCMV (4), HIV (5, 14), RSV (11) , VV(13)</b> |
| Translation elongation factor 2               | eEF-2          | gi 28627569  | Spodoptera exigua     | <b>EBV (3), HCMV (4), HIV (5), KSHV (8)</b>              |
| Translation initiation factor 2 gamma subunit | eIF2 $\gamma$  | gi 51965708  | Bombyx mori           |                                                          |
| Eukaryotic translation initiation factor 4A   | eIF-4A         | gi 73695588  | Bombyx mori           | <b>HCMV (4)</b>                                          |
| Eukaryotic translation initiation factor 5    | eIF-5          | gi 112983206 | Bombyx mori           |                                                          |
| Eukaryotic translation initiation factor 5A   | eIF-5A         | gi 76786562  | Bombyx mori           |                                                          |
| Eukaryotic initiation factor 5C               | eIF-5C         | gi 189031276 | Helicoverpa armigera  |                                                          |
| Ribosomal protein L14                         | RPL14          | gi 15213764  | Spodoptera frugiperda |                                                          |
| Ribosomal protein L22                         | RPL22          | gi 116833097 | Helicoverpa armigera  |                                                          |
| Ribosomal protein L23                         | RPL23          | gi 54609237  | Bombyx mori           |                                                          |
| Ribosomal protein L4                          | RPL4           | gi 170280411 | Heliothis virescens   |                                                          |
| Ribosomal protein L6e                         | RPL6e          | gi 161015753 | Spodoptera exigua     |                                                          |
| 60S acidic ribosomal protein P0               | RPP0           | gi 18253041  | Spodoptera frugiperda | <b>VV (13)</b>                                           |
| 60S acidic ribosomal protein P2               | RPP2           | gi 18253045  | Spodoptera frugiperda |                                                          |
| Ribosomal protein S12                         | RPS12          | gi 54609307  | Bombyx mori           |                                                          |
| Ribosomal protein S19                         | RPS19          | gi 15213826  | Spodoptera frugiperda |                                                          |
| Ribosomal protein S20e                        | RPS20e         | gi 50284390  | Papilio dardanus      |                                                          |
| Ribosomal protein S3                          | RPS3           | gi 16566719  | Spodoptera frugiperda |                                                          |
| 40S ribosomal protein S4                      | RPS4           | gi 74844658  | Spodoptera frugiperda |                                                          |
| Ribosomal protein L5                          | RPL5           | gi 268306434 | Manduca sexta         |                                                          |
| Translational controlled tumor protein        | TCTP           | gi 294862569 | Helicoverpa armigera  |                                                          |

|                                 |                                                             |                       |              |                       |                                                                                        |
|---------------------------------|-------------------------------------------------------------|-----------------------|--------------|-----------------------|----------------------------------------------------------------------------------------|
| Post-translational modification | Protein disulfide isomerase                                 | PDI                   | gi 328670881 | Helicoverpa armigera  | <b>HCMV (4), HIV (5)</b>                                                               |
|                                 | Arg methyltransferase                                       | PRMT                  | gi 321442023 | Spodoptera frugiperda |                                                                                        |
| Chaperone                       | Calreticulin                                                | Calreticulin          | gi 75013004  | Bombyx mori           | <b>HCMV (4)</b>                                                                        |
|                                 | Chaperonin subunit 4 delta                                  | CCT4 $\delta$         | gi 87248081  | Bombyx mori           |                                                                                        |
|                                 | Chaperonin subunit 6a zeta                                  | CCT6A                 | gi 87248083  | Bombyx mori           |                                                                                        |
|                                 | Heat shock protein 70                                       | HSP70                 | gi 219671577 | Helicoverpa armigera  | <b>EBV (3), HCMV (4), HIV (14), HSV (6), KSHV (8, 12), MMLV (9), RSV (11), VV (13)</b> |
|                                 | 90-kDa heat shock protein                                   | HSP90                 | gi 310893429 | Helicoverpa armigera  | <b>EBV (3), HCMV (4), HIV (5), KSHV (8), RSV (11)</b>                                  |
|                                 | Heat shock protein 105                                      | HSP105                | gi 328670879 | Helicoverpa armigera  |                                                                                        |
|                                 | Chaperonin containing t-complex polypeptide 1 beta subunit  | TCP-1 $\beta$ (CCT2)  | gi 87248085  | Bombyx mori           | <b>HIV (5)</b>                                                                         |
|                                 | Chaperonin containing t-complex polypeptide 1 theta subunit | TCP-1 $\theta$ (CCT8) | gi 120444903 | Bombyx mori           | <b>EBV (3)</b>                                                                         |
| Protein degradation             | Proteasome alpha 3 subunit                                  | PSMA3                 | gi 95102712  | Bombyx mori           |                                                                                        |
|                                 | Proteasome zeta subunit                                     | PMSA5                 | gi 87248207  | Bombyx mori           |                                                                                        |
|                                 | Proteasome 26S subunit 6A                                   | PSMA6-A               | gi 308512763 | Biston betularia      |                                                                                        |
|                                 | Proteasome 26S non-ATPase subunit 7                         | PSMD7                 | gi 95103074  | Bombyx mori           |                                                                                        |
| Molecular transport             | ATP-binding cassette sub-family C member 1                  | ABCC1                 | gi 283855787 | Trichoplusia ni       |                                                                                        |
|                                 | Chloride intracellular channel isoform 1                    | CLIC                  | gi 95102944  | Bombyx mori           | <b>HIV (5), PRV (15)</b>                                                               |
|                                 | Fatty acid-binding protein 3                                | FABP3                 | gi 171740911 | Helicoverpa armigera  |                                                                                        |
|                                 | Karyopherin beta 3                                          | KPNB3                 | gi 183979303 | Papilio xuthus        |                                                                                        |
|                                 | GTP-binding nuclear protein Ran                             | RAN                   | gi 87248587  | Bombyx mori           | <b>HIV (5)</b>                                                                         |

|                                              |                                                 |                                |              |                      |                                                       |
|----------------------------------------------|-------------------------------------------------|--------------------------------|--------------|----------------------|-------------------------------------------------------|
| Vesicle transport                            | ADP-ribosylation factor                         | ARF                            | gi 87248075  | Bombyx mori          | <b>AcMNPV (1), HIV (5), HSV (6)</b>                   |
|                                              | Annexin B                                       | Annexin B                      | gi 238915969 | Heliothis virescens  | <b>AcMNPV (1)</b>                                     |
|                                              | Annexin isoform 2                               | Annexin X                      | gi 87248455  | Bombyx mori          |                                                       |
|                                              | Annexin IX                                      | Annexin IX                     | gi 328670889 | Helicoverpa armigera |                                                       |
|                                              | Clathrin heavy chain                            | CHC                            | gi 219362829 | Bombyx mori          | <b>EBV (3), HCMV (4), HIV (5), MMLV (9)</b>           |
|                                              | Coatomer protein complex subunit delta          | COPD                           | gi 289629216 | Bombyx mori          |                                                       |
|                                              | N-ethylmaleimide sensitive fusion protein       | NSF                            | gi 57903680  | Helicoverpa armigera |                                                       |
|                                              | Small GTP binding protein RAB5                  | RAB5                           | gi 99082892  | Bombyx mori          | <b>AcMNPV BV (1), HIV (5), HSV (6)</b>                |
|                                              | Small GTP binding protein RAB7                  | RAB7                           | gi 95102652  | Bombyx mori          | <b>HIV (5), HSV (6), KSHV (8), MMLV (9), PRV (15)</b> |
|                                              | Small GTP-binding protein RAB10                 | RAB10                          | gi 148298847 | Bombyx mori          | <b>HSV (6)</b>                                        |
|                                              | Ras-related GTP-binding protein RAB11           | RAB11                          | gi 112983314 | Bombyx mori          | <b>AcMNPV BV (1), HIV (5), HSV (6)</b>                |
|                                              | Syntaxin                                        | Syntaxin                       | gi 321440845 | Platynota idaeusalis | <b>PRV (15)</b>                                       |
|                                              | Transitional endoplasmic reticulum ATPase TER94 | TER94                          | gi 95102992  | Bombyx mori          |                                                       |
|                                              | Vesicle amine transport protein                 | VAT                            | gi 95103100  | Bombyx mori          |                                                       |
|                                              | Signaling                                       | V-type proton ATPase subunit B | V-ATPase B   | gi 302138846         | Helicoverpa armigera                                  |
| H <sup>+</sup> transporting ATPase subunit D |                                                 | V-ATPase D                     | gi 307695440 | Helicoverpa armigera | <b>HIV (5), MMLV (9)</b>                              |
| 14-3-3 zeta                                  |                                                 | 14-3-3 ζ                       | gi 239736502 | Helicoverpa armigera | <b>AcMNPV BV (1), HCMV (4), HSV (6), KSHV (8)</b>     |
| 14-3-3 epsilon protein                       |                                                 | 14-3-3 ε                       | gi 148298752 | Bombyx mori          | <b>EBV (3), HCMV (4), HSV (6), PRV (15)</b>           |
| Arginine kinase                              |                                                 | AK                             | gi 156968301 | Helicoverpa armigera |                                                       |
| Casein kinase 2 alpha subunit                |                                                 | CK II α                        | gi 62042001  | Bombyx mori          | <b>AcMNPV BV (1), HCMV (4), HSV (6), PRV (15)</b>     |



|               |                                                          |                    |                  |              |                       |                                                         |
|---------------|----------------------------------------------------------|--------------------|------------------|--------------|-----------------------|---------------------------------------------------------|
|               | GTP-binding protein alpha subunit                        | alpha              | G $\alpha$       | gi 61808332  | Helicoverpa armigera  |                                                         |
|               | Heterotrimeric nucleotide-binding protein beta subunit   | guanine            | G $\beta$        | gi 95103038  | Bombyx mori           | <b>PRV (15)</b>                                         |
|               | Heterotrimeric binding protein gamma subunit             | guanine nucleotide | G $\gamma$       | gi 116833155 | Helicoverpa armigera  |                                                         |
|               | G protein alpha subunit Go                               |                    | Go               | gi 56342245  | Bombyx mori           |                                                         |
|               | Putative lethal (2) giant larvae                         |                    | Lgl              | gi 261335917 | Heliconius melpomene  |                                                         |
|               | Protein phosphatase 2 regulatory subunit A alpha isoform |                    | PP2A             | gi 329130427 | Helicoverpa armigera  | <b>HCMV (4),</b>                                        |
|               | Receptor for activated protein kinase C homolog          |                    | RACK             | gi 338190281 | Helicoverpa armigera  |                                                         |
|               | Small GTPase                                             |                    | Rho1             | gi 23573606  | Spodoptera frugiperda | <b>AcMNPV BV (1), PRV (15)</b>                          |
| Immunity      | Cyclophilin A                                            |                    | CyP A            | gi 298111994 | Mythimna separata     | <b>HCMV (4), HIV (5, 14), HSV (6), IV (7), KSHV (8)</b> |
|               | pxS-adenosyl-L-homocysteine hydrolase                    |                    | px-AHH           | gi 117970173 | Plutella xylostella   |                                                         |
| Antioxidation | Cytochrome b5                                            |                    | CYB5             | gi 3511145   | Helicoverpa armigera  |                                                         |
| Metabolism    | Phosphoribosylaminoimidazole carboxylase                 |                    | AIR carboxylase  | gi 95102674  | Bombyx mori           |                                                         |
|               | Aldo-keto reductase                                      |                    | AKR              | gi 328670873 | Helicoverpa armigera  |                                                         |
|               | Carboxyl/choline CCE014a                                 | esterase           | CCE014a          | gi 294846804 | Helicoverpa armigera  |                                                         |
|               | ATP synthase                                             |                    | F-ATPase $\beta$ | gi 300250972 | Helicoverpa zea       | <b>HIV (5)</b>                                          |
|               | Fructose aldolase                                        | 1,6-bisphosphate   | FBA              | gi 45330818  | Antheraea yamamai     |                                                         |

|                                          |        |              |                      |                                                                                      |
|------------------------------------------|--------|--------------|----------------------|--------------------------------------------------------------------------------------|
| Glyceraldehyde-3-phosphate dehydrogenase | GAPDH  | gi 90309026  | Bombyx mori          | <b>EBV (3), HCMV (4), HIV (5, 14), HSV (6), IV (7), KSHV (8), MMLV (9), RSV (11)</b> |
| Glycyl-tRNA synthetase                   | GARS   | gi 665680    | Bombyx mori          |                                                                                      |
| Glutathione S-transferase                | GST    | gi 289719016 | Helicoverpa armigera | <b>HIV (5), IV (7), PRV (15)</b>                                                     |
| Juvenile hormone epoxide hydrolase       | JHEH   | gi 299481057 | Helicoverpa armigera |                                                                                      |
| Mitochondrial aldehyde dehydrogenase     | mtALDH | gi 87248351  | Bombyx mori          |                                                                                      |
| Phosphoglycerate kinase                  | PGK    | gi 312597600 | Bombyx mori          | <b>EBV (3), HCMV (4), HIV (5), IV (7), KSHV (8), VV (13)</b>                         |
| Seryl-tRNA synthetase                    | SerRS  | gi 328670885 | Helicoverpa armigera |                                                                                      |
| Transketolase                            | TKT    | gi 87248239  | Bombyx mori          | <b>HCMV (4)</b>                                                                      |
| Triosephosphate isomerase                | TPI    | gi 154707830 | Helicoverpa armigera | <b>HCMV (4), HIV (5), HSV (6)</b>                                                    |
| Thioredoxin peroxidase                   | TPx    | gi 159459926 | Helicoverpa armigera |                                                                                      |

### B. Host proteins associated with HearNPV ODV.

| Classification                 | Protein                                     | Abbreviation    | GI no.       | Species              | Other virus(es) reported to contain protein <sup>a</sup>                                                           |
|--------------------------------|---------------------------------------------|-----------------|--------------|----------------------|--------------------------------------------------------------------------------------------------------------------|
| Cytoskeleton                   | Actin, cytoplasmic A3a                      | Actin           | gi 3182902   | Helicoverpa armigera | <b>AcMNPV BV (1), AIHV (2), EBV (3), HCMV (4), HIV (5), HSV (6), IV (7), KSHV (8), MMLV (9), RSV (11), VV (13)</b> |
|                                | Actin-depolymerizing factor 1               | ADF-1           | gi 95103010  | Bombyx mori          | <b>AcMNPV BV (1), HSV (6)</b>                                                                                      |
|                                | Profilin                                    | Profilin        | gi 56404766  | Bombyx mori          | <b>HCMV (4), HSV (6), IV (7), PRV (15)</b>                                                                         |
|                                | Transgelin                                  | Transgelin      | gi 95102666  | Bombyx mori          | <b>HCMV (4), IV (7), MPV (10), VV (10), PRV (15)</b>                                                               |
| Transcription and Translation  | Eukaryotic translation initiation factor 5A | eIF5A           | gi 76786562  | Bombyx mori          |                                                                                                                    |
|                                | Sr protein                                  | SR              | gi 87248221  | Bombyx mori          | <b>AcMNPV BV (1)</b>                                                                                               |
|                                | Translational controlled tumor protein      | TCTP            | gi 294862569 | Helicoverpa armigera |                                                                                                                    |
| Chaperone                      | Heat shock protein 70                       | HSP70           | gi 219671577 | Helicoverpa armigera | <b>EBV (3), HCMV (4), HIV (5, 14), HSV (6), KSHV (8), MMLV (9), RSV (11), VV (13)</b>                              |
| Posttranslational modification | Serine protease                             | Serine protease | gi 297340778 | Helicoverpa armigera | <b>HIV (5, 14)</b>                                                                                                 |
| Molecular transport            | Diazepam-binding inhibitor                  | DBI             | gi 40022264  | Helicoverpa armigera | <b>IV (7)</b>                                                                                                      |
|                                | Fatty acid-binding protein 3                | FABP3           | gi 171740911 | Helicoverpa armigera |                                                                                                                    |
| Vesicle transport              | Small GTP binding protein Rab7              | RAB7            | gi 95102652  | Bombyx mori          | <b>AcMNPV BV (1), HIV (5), HSV (6), KSHV (8), MMLV (9), PRV (15), VV (13)</b>                                      |
| Signaling                      | 14-3-3 zeta                                 | 14-3-3 ζ        | gi 239736502 | Helicoverpa armigera | <b>AcMNPV BV (1), HCMV (4), HSV (6), KSHV (8)</b>                                                                  |
|                                | 14-3-3 epsilon                              | 14-3-3 ε        | gi 95102932  | Bombyx mori          | <b>EBV (3), HCMV (4), HSV (6), PRV (15)</b>                                                                        |
|                                | Cyclin 3                                    | Cyclin 3        | gi 158508578 | Bombyx mori          |                                                                                                                    |
|                                | Ubiquitin                                   | Ubiquitin       | gi 38373984  | Helicoverpa armigera | <b>AcMNPV BV (1), HCMV (4), HIV (5, 14), HSV (6), IV</b>                                                           |

|               |                                    |      |              |                      |                                               |
|---------------|------------------------------------|------|--------------|----------------------|-----------------------------------------------|
|               |                                    |      |              |                      | <b>(7), MMLV (9), RSV (11), VV (13)</b>       |
|               | Ubiquitin-related modifier protein | URM  | gi 294714040 | Helicoverpa armigera |                                               |
| Immunity      | Cyclophilin A                      | CyPA | gi 298111994 | Mythimna separata    | <b>HCMV (4), HIV (5, 14), HSV (6), IV (7)</b> |
|               | FK506-binding protein              | FKBP | gi 95102696  | Bombyx mori          |                                               |
| Antioxidation | Glutaredoxin                       | GRX  | gi 87248503  | Bombyx mori          |                                               |
|               | Thioredoxin                        | Trx  | gi 124127033 | Bombyx mori          | <b>PRV (15)</b>                               |

## References

1. **Wang, R., F. Deng, D. Hou, Y. Zhao, L. Guo, H. Wang, and Z. Hu.** 2010. Proteomics of the *Autographa californica* nucleopolyhedrovirus budded virions. *J. Virol.* **84**:7233-7242.
2. **Dry, I., D. M. Haig, N. F. Inglis, L. Imrie, J. P. Stewart, and G. C. Russell.** 2008. Proteomic analysis of pathogenic and attenuated alcelaphine herpesvirus 1. *J. Virol.* **82**:5390-5397.
3. **Johannsen, E., M. Luftig, M. R. Chase, S. Weicksel, E. Cahir-McFarland, D. Illanes, D. Sarracino, and E. Kieff.** 2004. Proteins of purified Epstein-Barr virus. *P. Natl. Acad. Sci. USA.* **101**:16286-16291.
4. **Varnum, S. M., D. N. Streblow, M. E. Monroe, P. Smith, K. J. Auberry, L. Pasa-Tolic, D. Wang, D. G. Camp, 2nd, K. Rodland, S. Wiley, W. Britt, T. Shenk, R. D. Smith, and J. A. Nelson.** 2004. Identification of proteins in human cytomegalovirus (HCMV) particles: the HCMV proteome. *J. Virol.* **78**:10960-10966.
5. **Chertova, E., O. Chertov, L. V. Coren, J. D. Roser, C. M. Trubey, J. W. Bess, Jr., R. C. Sowder, 2nd, E. Barsov, B. L. Hood, R. J. Fisher, K. Nagashima, T. P. Conrads, T. D. Veenstra, J. D. Lifson, and D. E. Ott.** 2006. Proteomic and biochemical analysis of purified human immunodeficiency virus type 1 produced from infected monocyte-derived macrophages. *J. Virol.* **80**:9039-9052.
6. **Loret, S., G. Guay, and R. Lippe.** 2008. Comprehensive characterization of extracellular herpes simplex virus type 1 virions. *J. Virol.* **82**:8605-8618.
7. **Shaw, M. L., K. L. Stone, C. M. Colangelo, E. E. Gulcicek, and P. Palese.** 2008. Cellular proteins in influenza virus particles. *PLoS. Pathog.* **4**:e1000085.
8. **Zhu, F. X., J. M. Chong, L. Wu, and Y. Yuan.** 2005. Virion proteins of Kaposi's sarcoma-associated herpesvirus. *J. Virol.* **79**:800-811.
9. **Segura, M. M., A. Garnier, M. R. Di Falco, G. Whissell, A. Meneses-Acosta, N. Arcand, and A. Kamen.** 2008. Identification of host proteins associated with retroviral vector particles by proteomic analysis of highly purified vector preparations. *J. Virol.* **82**:1107-1117.
10. **Manes, N. P., R. D. Estep, H. M. Mottaz, R. J. Moore, T. R. Clauss, M. E. Monroe, X. Du, J. N. Adkins, S. W. Wong, and R. D. Smith.** 2008. Comparative proteomics of human monkeypox and vaccinia intracellular mature and extracellular enveloped virions. *J. Proteome. Res.* **7**:960-968.
11. **Radhakrishnan, A., D. Yeo, G. Brown, M. Z. Myaing, L. R. Iyer, R. Fleck, B. H. Tan, J. Aitken, D. Sanmun, K. Tang, A. Yarwood, J. Brink, and R. J. Sugrue.** 2010. Protein analysis of purified respiratory syncytial virus particles reveals an important role for heat shock protein 90 in virus particle assembly. *Mol. Cell. Proteomics.* **9**:1829-1848.
12. **Bechtel, J. T., R. C. Winant, and D. Ganem.** 2005. Host and viral proteins in the virion of Kaposi's sarcoma-associated herpesvirus. *J. Virol.* **79**:4952-4964.
13. **Resch, W., K. K. Hixson, R. J. Moore, M. S. Lipton, and B. Moss.** 2007. Protein composition of the vaccinia virus mature virion. *Virology* **358**:233-247.
14. **Saphire, A. C., P. A. Gallay, and S. J. Bark.** 2006. Proteomic analysis of human immunodeficiency virus using liquid chromatography/tandem mass spectrometry effectively distinguishes specific incorporated host proteins. *J. Proteome. Res.* **5**:530-538.
15. **Kramer, T., T. M. Greco, L. W. Enquist, and I. M. Cristea.** 2011. Proteomic characterization of pseudorabies virus extracellular virions. *J. Virol.* **85**:6427-6441.

**Table S3. Summary of the gene knockout effects on the homologues of the BV and ODV proteins.**

| No. | Protein*    | HearNPV                        |     | ORF     |        |       | Gene knockout references <sup>s</sup> |                                       |                                    | Gene knockout effects <sup>&amp;</sup>                                                | Interpreted protein category                           |
|-----|-------------|--------------------------------|-----|---------|--------|-------|---------------------------------------|---------------------------------------|------------------------------------|---------------------------------------------------------------------------------------|--------------------------------------------------------|
|     |             | virion-associated <sup>#</sup> | ODV | HearNPV | AcMNPV | BmNPV | HearNPV                               | AcMNPV                                | BmNPV                              |                                                                                       |                                                        |
| 1   | P78/83      | BV                             | ODV | 2       | 9      | 2     | [1] <sup>b</sup>                      | [2] <sup>b</sup>                      | [3] <sup>b</sup>                   | <sup>b</sup> Lethal                                                                   | Structural protein                                     |
| 2   | HOAR        |                                | ODV | 4       | -      | -     |                                       |                                       |                                    |                                                                                       |                                                        |
| 3   | <u>HA9</u>  | BV                             | ODV | 9       | 142    | 118   |                                       | [4] <sup>b</sup> , [5] <sup>a</sup>   | [6] <sup>a</sup>                   | <sup>a</sup> Lethal with absent nucleocapsid; <sup>b</sup> Lethal                     | Structural protein                                     |
| 4   | <u>E18</u>  | BV                             | ODV | 10      | 143    | 119   |                                       | [7] <sup>b</sup>                      | [3] <sup>d</sup>                   | <sup>b</sup> Lethal; <sup>d</sup> Severely affect BV production                       | Very likely structural protein                         |
| 5   | <u>EC27</u> | BV                             | ODV | 11      | 144    | 120   |                                       | [5] <sup>a</sup>                      | [3] <sup>b</sup>                   | <sup>a</sup> Lethal with absent nucleocapsid; <sup>b</sup> Lethal                     | Structural protein                                     |
| 6   | <u>PIF5</u> |                                | ODV | 15      | 148    | 124   |                                       | [8,9] <sup>c</sup>                    | [10] <sup>c</sup>                  | <sup>c</sup> Inactivation of ODV infectivity                                          | Structural protein; likely to be trapped protein in BV |
| 7   | <u>P74</u>  |                                | ODV | 20      | 138    | 115   | [11] <sup>c</sup>                     | [12] <sup>c</sup>                     | [3] <sup>e</sup>                   | <sup>c</sup> Inactivation of ODV infectivity; <sup>e</sup> No effect on BV production | Structural protein                                     |
| 8   | ME53        | BV                             |     | 16      | 139    | 116   |                                       | [13] <sup>d</sup> , [14] <sup>b</sup> | [3] <sup>d</sup>                   | <sup>b</sup> Lethal; <sup>d</sup> Severely affect BV production                       | Very likely structural protein                         |
| 9   | P26         | BV                             |     | 22      | 136    | 113   |                                       | [15] <sup>e</sup>                     | [3] <sup>e</sup>                   | <sup>e</sup> No effect on BV production                                               | Might be trapped protein                               |
| 10  | LEF-6       | BV                             |     | 24      | 28     | 19    |                                       | [16] <sup>d</sup>                     | [3] <sup>e</sup>                   | <sup>d</sup> Low production of BV; <sup>e</sup> No effect on BV production            | Might be either structural or trapped protein          |
| 11  | HA26        |                                | ODV | 26      | 26     | 17    |                                       |                                       | [3] <sup>d</sup>                   | <sup>d</sup> Severely affect BV production                                            | Might be either structural or trapped protein          |
| 12  | V-Ubi       | BV                             | ODV | 28      | 35     | 26    |                                       | [17] <sup>d</sup>                     | [3] <sup>e</sup> [18] <sup>e</sup> | <sup>d</sup> Low production of BV; <sup>e</sup> No effect on                          | Might be either                                        |

|    |               |    |     |    |       |     |  |                      |                                                                                                      |                                                                |                                                                                                                                                                                           |                                |
|----|---------------|----|-----|----|-------|-----|--|----------------------|------------------------------------------------------------------------------------------------------|----------------------------------------------------------------|-------------------------------------------------------------------------------------------------------------------------------------------------------------------------------------------|--------------------------------|
|    |               |    |     |    |       |     |  |                      | BV production                                                                                        | structural or trapped protein                                  |                                                                                                                                                                                           |                                |
| 13 | HA39          |    | ODV | 39 | 51    | 40  |  | [3] <sup>b</sup>     | <sup>b</sup> Lethal                                                                                  | Very likely structural protein                                 |                                                                                                                                                                                           |                                |
| 14 | ChiA          | BV |     | 41 | 126   | 103 |  | [19] <sup>d</sup>    | <sup>d</sup> Affect liquefaction of the infected host;<br><sup>e</sup> No effect on BV production    | Might be either structural or trapped protein                  |                                                                                                                                                                                           |                                |
| 15 | HA44          | BV | ODV | 44 | -     | -   |  |                      |                                                                                                      |                                                                |                                                                                                                                                                                           |                                |
| 16 | HA45          |    | ODV | 45 | -     | -   |  |                      |                                                                                                      |                                                                |                                                                                                                                                                                           |                                |
| 17 | <u>VP1054</u> |    | ODV | 47 | 54    | 43  |  | [20] <sup>a</sup>    | <sup>a</sup> Lethal with malformed nucleocapsid;<br><sup>b</sup> Lethal                              | Very likely structural protein                                 |                                                                                                                                                                                           |                                |
| 18 | HA51          | BV | ODV | 51 | 58/59 | 47  |  | [21] <sup>d</sup>    | <sup>d</sup> Increase BV production and DNA accumulation;<br><sup>e</sup> No effect on BV production | Might be either structural or trapped protein                  |                                                                                                                                                                                           |                                |
| 19 | HA52          |    | ODV | 52 | 60    | 48  |  |                      | <sup>e</sup> No effect on BV production                                                              | Might be either structural or trapped protein                  |                                                                                                                                                                                           |                                |
| 20 | FP25K         | BV | ODV | 53 | 61    | 49  |  | [22] <sup>d</sup>    | [23] <sup>d</sup>                                                                                    | [3] <sup>e</sup> , [24-26] <sup>d</sup>                        | <sup>d</sup> Increase BV production; reduction of ODV; affect nuclear transport of ODV envelope proteins; affect post-mortem host degradation;<br><sup>e</sup> No effect on BV production | Very likely structural protein |
| 21 | HA57          | BV |     | 57 | -     | -   |  |                      |                                                                                                      |                                                                |                                                                                                                                                                                           |                                |
| 22 | GP37          | BV |     | 58 | 64    | 52  |  | [27] <sup>e</sup>    | [3] <sup>e</sup>                                                                                     | <sup>e</sup> No effect on BV production;                       | Might be trapped protein                                                                                                                                                                  |                                |
| 23 | <u>PIF6</u>   |    | ODV | 64 | 68    | 56  |  | [28,29] <sup>c</sup> | [3] <sup>e</sup>                                                                                     | <sup>c</sup> Inactivation of ODV; <sup>e</sup> No effect on BV | Structural protein                                                                                                                                                                        |                                |

|    |              |    |     |    |    |    |                                          |                      |                                                                                         |                                               |
|----|--------------|----|-----|----|----|----|------------------------------------------|----------------------|-----------------------------------------------------------------------------------------|-----------------------------------------------|
| 24 | <u>HA66</u>  | BV | ODV | 66 | 66 | 54 | [30] <sup>d</sup>                        | [3, 31] <sup>b</sup> | production<br><sup>b</sup> Lethal, <sup>d</sup> Severely affect BV production           | Structural protein                            |
| 25 | HA68         | BV |     | 68 | 74 | 60 |                                          | [32] <sup>d</sup>    | <sup>d</sup> With 10 fold lower BV production                                           | Might be either structural or trapped protein |
| 26 | HA69         | BV | ODV | 69 | 75 | 61 |                                          | [3, 33] <sup>b</sup> | <sup>b</sup> Lethal                                                                     | Might be either structural or trapped protein |
| 27 | <u>VLf-1</u> |    | ODV | 71 | 77 | 63 | [34,35] <sup>a</sup>                     | [3] <sup>b</sup>     | <sup>a</sup> Lethal with malformed nucleocapsid;<br><sup>b</sup> Lethal                 | Structural protein                            |
| 28 | <u>HA72</u>  |    | ODV | 72 | 78 | 64 |                                          | [3] <sup>b</sup>     | <sup>b</sup> Lethal                                                                     | Might be either structural or trapped protein |
| 29 | <u>GP41</u>  | BV | ODV | 73 | 80 | 66 | [36] <sup>d</sup>                        | [3] <sup>d</sup>     | <sup>d</sup> Severely affect BV production; affect nucleocapsid egress from the nucleus | Structural protein                            |
| 30 | <u>HA74</u>  |    | ODV | 74 | 81 | 67 |                                          | [3, 37] <sup>b</sup> | <sup>b</sup> Lethal                                                                     | Might be either structural or trapped protein |
| 31 | <u>VP91</u>  |    | ODV | 76 | 83 | 69 |                                          | [3] <sup>b</sup>     | <sup>b</sup> Lethal                                                                     | Might be either structural or trapped protein |
| 32 | <u>VP39</u>  | BV | ODV | 78 | 89 | 72 |                                          | [3] <sup>b</sup>     | <sup>b</sup> Lethal                                                                     | Structural protein                            |
| 33 | <u>P33</u>   |    | ODV | 80 | 92 | 75 | [38] <sup>b</sup> ,<br>[39] <sup>d</sup> | [3] <sup>b</sup>     | <sup>b</sup> Lethal; <sup>d</sup> Severely affect BV production                         | Very likely structural protein                |
| 34 | E25          | BV | ODV | 82 | 94 | 77 | [40] <sup>d</sup>                        | [3] <sup>b</sup>     | <sup>b</sup> Lethal; <sup>d</sup> Severely affect BV and ODV production                 | Very likely structural protein                |



|    |             |    |     |     |     |    |                   |                                          |                                      |                                                                                                      |                                |
|----|-------------|----|-----|-----|-----|----|-------------------|------------------------------------------|--------------------------------------|------------------------------------------------------------------------------------------------------|--------------------------------|
| 35 | <u>PIF4</u> |    | ODV | 85  | 96  | 79 | [41] <sup>c</sup> | [42] <sup>c</sup>                        | [3] <sup>b</sup>                     | <sup>c</sup> Inactivation of ODV; <sup>b</sup> Lethal                                                | Structural protein             |
| 36 | <u>38K</u>  | BV | ODV | 86  | 98  | 82 |                   | [43] <sup>a</sup>                        | [3] <sup>b</sup>                     | <sup>a</sup> Lethal with malformed nucleocapsids;<br><sup>b</sup> Lethal                             | Very likely structural protein |
| 37 | <u>P6.9</u> | BV | ODV | 88  | 100 | 84 |                   | [44] <sup>a</sup>                        | [3] <sup>b</sup>                     | <sup>a</sup> Lethal with malformed nucleocapsids;<br><sup>b</sup> Lethal                             | Structural protein             |
| 38 | <u>C42</u>  | BV | ODV | 89  | 101 | 85 |                   | [5] <sup>a</sup>                         | [3] <sup>b</sup>                     | <sup>a</sup> Lethal with absent nucleocapsids;<br><sup>b</sup> Lethal                                | Structural protein             |
| 39 | P12         | BV | ODV | 90  | 102 | 86 |                   | [45] <sup>b</sup>                        | [3] <sup>b</sup>                     | <sup>b</sup> Lethal                                                                                  | Very likely structural protein |
| 40 | <u>P48</u>  | BV |     | 91  | 103 | 87 |                   | [46] <sup>b</sup>                        | [3] <sup>b</sup>                     | <sup>b</sup> Lethal                                                                                  | Very likely structural protein |
| 41 | VP80        | BV | ODV | 92  | 104 | 88 |                   | [47] <sup>b</sup>                        | [3, 48] <sup>b</sup>                 | <sup>b</sup> Lethal                                                                                  | Structural protein             |
| 42 | <u>EC43</u> |    | ODV | 94  | 109 | 92 |                   | [49] <sup>b</sup> ,<br>[50] <sup>a</sup> | [3] <sup>b</sup>                     | <sup>a</sup> Lethal with absent nucleocapsids;<br><sup>b</sup> Lethal                                | Structural protein             |
| 43 | ODV-E66     |    | ODV | 96  | 46  | 37 |                   | [51] <sup>c</sup>                        | [3] <sup>e</sup>                     | <sup>c</sup> Inactivation of ODV; <sup>e</sup> No effects on BV production                           | Structural protein             |
| 44 | <u>PIF3</u> |    | ODV | 98  | 115 | 95 | [11] <sup>c</sup> | [52] <sup>c</sup>                        | [3] <sup>e</sup>                     | <sup>c</sup> Inactivation of ODV; <sup>e</sup> No effects on BV production                           | Structural protein             |
| 45 | HA100       | BV | ODV | 100 | -   | -  | [53] <sup>d</sup> |                                          |                                      | <sup>d</sup> Affect ODV infectivity                                                                  | Very likely structural protein |
| 46 | SOD         |    | ODV | 106 | 31  | 23 |                   | [54] <sup>e</sup>                        | [3] <sup>e</sup>                     | <sup>e</sup> No effect on BV production; No effects for <i>in vitro</i> and <i>in vivo</i> infection | Might be trapped protein       |
| 47 | <u>PIF1</u> |    | ODV | 111 | 119 | 97 | [11] <sup>c</sup> | [52, 55] <sup>c</sup>                    | [3] <sup>e</sup>                     | <sup>c</sup> Inactivation of ODV; <sup>e</sup> No effects on BV production                           | Structural protein             |
| 48 | FGF         | BV |     | 113 | 32  | 24 |                   | [56] <sup>e</sup>                        | [3] <sup>e</sup> , [57] <sup>d</sup> | <sup>e</sup> No affect on BV production; <sup>d</sup> Lower BV production and longer killing time in | Very likely structural protein |

|    |             |    |     |     |     |     |                       |                       |                                      | larvae                                                                                                     |                                               |  |
|----|-------------|----|-----|-----|-----|-----|-----------------------|-----------------------|--------------------------------------|------------------------------------------------------------------------------------------------------------|-----------------------------------------------|--|
| 49 | P24         | BV | ODV | 118 | 129 | 106 |                       |                       | [3] <sup>e</sup>                     | <sup>e</sup> No affect on BV production                                                                    | Might be trapped protein                      |  |
| 50 | PEP         | BV | ODV | 120 | 131 | 108 |                       |                       | [3] <sup>e</sup>                     | <sup>e</sup> No affect on BV production                                                                    | Might be trapped protein                      |  |
| 51 | HA128       | BV |     | 128 | 17  | 9   | [58] <sup>d</sup>     |                       | [3] <sup>e</sup> , [59] <sup>d</sup> | <sup>d</sup> Delayed BV production; Lower BV production; <sup>e</sup> No effects on BV production          | Might be trapped protein                      |  |
| 52 | PKIP        | BV |     | 130 | 24  | 15  |                       |                       | [3] <sup>d</sup>                     | <sup>d</sup> Severely affect BV production                                                                 | Might be either structural or trapped protein |  |
| 53 | <u>PIF2</u> |    | ODV | 132 | 22  | 13  | [11, 60] <sup>c</sup> | [52,55] <sup>c</sup>  | [3] <sup>e</sup>                     | <sup>c</sup> Inactivation of ODV; <sup>e</sup> No effects on BV production                                 | Structural protein                            |  |
| 54 | F protein   | BV |     | 133 | 23  | 14  | [61] <sup>b</sup>     | [62, 63] <sup>d</sup> | [3] <sup>e</sup>                     | <sup>b</sup> Lethal; <sup>d</sup> With some effects on BV and ODV; <sup>e</sup> No affect on BV production | Structural protein                            |  |

\*Proteins conserved in all baculoviruses are underlined.

#The information of BV/ODV associated protein are according to that of Figure 4.

\$For each reference, the effects of the gene knockout is marked as following: <sup>a</sup>Lethal with malformed or absent nucleocapsids; <sup>b</sup>Lethal; <sup>c</sup>Inactivation of ODV; <sup>d</sup>Some effects; <sup>e</sup>No effects.

## Reference

1. **Wang, Q., Y. Wang, C. Liang, J. Song, and X. Chen.** 2008. Identification of a hydrophobic domain of HA2 essential to morphogenesis of *Helicoverpa armigera* nucleopolyhedrovirus. *J. Virol.* 82:4072-4081.
2. **Goley, E. D., T. Ohkawa, J. Mancuso, J. B. Woodruff, J. A. D'Alessio, W. Z. Cande, L. E. Volkman, and M. D. Welch.** 2006. Dynamic nuclear actin assembly by Arp2/3 complex and a baculovirus WASP-like protein. *Science* 314:464-467.
3. **Ono, C., T. Kamagata, H. Taka, K. Sahara, S. Asano, and H. Bando.** 2012. Phenotypic grouping of 141 BmNPVs lacking viral gene sequences. *Virus. Res.* 165:197-206.
4. **Vanarsdall, A. L., M. N. Pearson, and G. F. Rohrmann.** 2007. Characterization of baculovirus constructs lacking either the Ac 101, Ac 142, or the Ac 144 open reading frame. *Virology* 367:187-195.
5. **McCarthy, C. B., X. Dai, C. Donly, and D. A. Theilmann.** 2008. *Autographa californica* multiple nucleopolyhedrovirus ac142, a core gene that is essential for BV production and ODV envelopment. *Virology* 372:325-339.
6. **Yang, Z. N., H. J. Xu, E. Y. Park, and C. X. Zhang.** 2008. Characterization of *Bombyx mori* nucleopolyhedrovirus with a deletion of bm118. *Virus. Res.* 135:220-229.
7. **McCarthy, C. B., and D. A. Theilmann.** 2008. AcMNPV ac143 (odv-e18) is essential for mediating budded virus production and is the 30th baculovirus core gene. *Virology* 375:277-291.
8. **Harrison, R. L., W. O. Sparks, and B. C. Bonning.** 2010. *Autographa californica* multiple nucleopolyhedrovirus ODV-E56 envelope protein is required for oral infectivity and can be substituted functionally by *Rachiplusia ou* multiple nucleopolyhedrovirus ODV-E56. *J. Gen. Virol.* 91:1173-1182.
9. **Sparks, W. O., R. L. Harrison, and B. C. Bonning.** 2011. *Autographa californica* multiple nucleopolyhedrovirus ODV-E56 is a per os infectivity factor, but is not essential for binding and fusion of occlusion-derived virus to the host midgut. *Virology* 409:69-76.
10. **Xiang, X., L. Chen, A. Guo, S. Yu, R. Yang, and X. Wu.** 2011. The *Bombyx mori* nucleopolyhedrovirus (BmNPV) ODV-E56 envelope protein is also a per os infectivity factor. *Virus. Res.* 155:69-75.
11. **Song, J., R. Wang, F. Deng, H. Wang, and Z. Hu.** 2008. Functional studies of per os infectivity factors of *Helicoverpa armigera* single nucleocapsid nucleopolyhedrovirus. *J. Gen. Virol.* 89:2331-2338.
12. **Faulkner, P., J. Kuzio, G. V. Williams, and J. A. Wilson.** 1997. Analysis of p74, a PDV envelope protein of *Autographa californica* nucleopolyhedrovirus required for occlusion body infectivity in vivo. *J. Gen. Virol.* 78:3091-3100.
13. **de Jong, J., B. M. Arif, D. A. Theilmann, and P. J. Krell.** 2009. *Autographa californica* multiple nucleopolyhedrovirus me53 (ac140) is a nonessential gene required for efficient budded-virus production. *J. Virol.* 83:7440-7448.
14. **Xi, Q., J. Wang, R. Deng, and X. Wang.** 2007. Characterization of AcMNPV with a deletion of me53 gene. *Virus genes* 34:223-232.
15. **Simon, O., T. Williams, P. Caballero, and R. D. Possee.** 2008. Effects of Acp26 on in

- vitro and in vivo productivity, pathogenesis and virulence of *Autographa californica* multiple nucleopolyhedrovirus. *Virus Res.* 136:202-205.
16. **Lin, G., and G. W. Blissard.** 2002. Analysis of an *Autographa californica* multicapsid nucleopolyhedrovirus lef-6-null virus: LEF-6 is not essential for viral replication but appears to accelerate late gene transcription. *J. Virol.* 76:5503-5514.
  17. **Reilly, L. M., and L. A. Guarino.** 1996. The viral ubiquitin gene of *Autographa californica* nuclear polyhedrosis virus is not essential for viral replication. *Virology* 218:243-247.
  18. Katsuma, S., Tsuchida, A., Matsuda-Imai, N., Kang, W., and Shimada, T. Role of the ubiquitin-proteasome system in *Bombyx mori* nucleopolyhedrovirus infection. *J. Gen. Virol.* 92:699-705
  19. **Hawtin, R. E., T. Zarkowska, K. Arnold, C. J. Thomas, G. W. Gooday, L. A. King, J. A. Kuzio, and R. D. Possee.** 1997. Liquefaction of *Autographa californica* nucleopolyhedrovirus-infected insects is dependent on the integrity of virus-encoded chitinase and cathepsin genes. *Virology* 238:243-253.
  20. **Olszewski, J., and L. K. Miller.** 1997. Identification and characterization of a baculovirus structural protein, VP1054, required for nucleocapsid formation. *J. Virol.* 71:5040-5050.
  21. **Zheng, F., Y. Huang, G. Long, X. Sun, and H. Wang.** 2011. *Helicoverpa armigera* single nucleocapsid nucleopolyhedrovirus ORF51 is a ChaB homologous gene involved in budded virus production and DNA replication. *Virus Res.* 155:203-212.
  22. **Wu, D., F. Deng, X. Sun, H. Wang, L. Yuan, J. M. Vlak, and Z. Hu.** 2005. Functional analysis of FP25K of *Helicoverpa armigera* single nucleocapsid nucleopolyhedrovirus. *J. Gen. Virol.* 86:2439-2444.
  23. **Rosas-Acosta, G., S. C. Braunagel, and M. D. Summers.** 2001. Effects of deletion and overexpression of the *Autographa californica* nuclear polyhedrosis virus FP25K gene on synthesis of two occlusion-derived virus envelope proteins and their transport into virus-induced intranuclear membranes. *J. Virol.* 75:10829-10842.
  24. **Katsuma, S., Y. Noguchi, C. L. Zhou, M. Kobayashi, and S. Maeda.** 1999. Characterization of the 25K FP gene of the baculovirus *Bombyx mori* nucleopolyhedrovirus: implications for post-mortem host degradation. *J. Gen. Virol.* 80:783-791.
  25. **Katsuma, S., T. Nakanishi, and T. Shimada.** 2009. *Bombyx mori* nucleopolyhedrovirus FP25K is essential for maintaining a steady-state level of v-cath expression throughout the infection. *Virus Res.* 140:155-160.
  26. **Nakanishi, T., C. Goto, M. Kobayashi, W. Kang, T. Suzuki, N. Dohmae, S. Matsumoto, T. Shimada, and S. Katsuma.** 2010. Comparative studies of lepidopteran baculovirus-specific protein FP25K: development of a novel *Bombyx mori* nucleopolyhedrovirus-based vector with a modified fp25K gene. *J. Virol.* 84:5191-5200.
  27. **Cheng, X., P. Krell, and B. Arif.** 2001. P34.8 (GP37) is not essential for baculovirus replication. *J. Gen. Virol.* 82:299-305.
  28. **Li, G., H. Chen, Q. Tang, G. Huang, R. Deng, J. Wang, and X. Wang.** 2011. Effect of ac68 knockout and lef3 leading sequence disruption on viral propagation. *Curr. Microbiol.* 62:191-197.

29. **Nie, Y., M. Fang, M. A. Erlandson, and D. A. Theilmann.** 2012. Analysis of the *Autographa californica* multiple nucleopolyhedrovirus overlapping gene pair *lef3* and *ac68* reveals that AC68 is a *per os* infectivity factor and that LEF3 is critical, but not essential, for virus replication. *J. Virol.* 86:3985-3994.
30. **Ke, J., J. Wang, R. Deng, and X. Wang.** 2008. *Autographa californica* multiple nucleopolyhedrovirus *ac66* is required for the efficient egress of nucleocapsids from the nucleus, general synthesis of preoccluded virions and occlusion body formation. *Virology* 374:421-431.
31. **Zhang, M. J., C. H. Tian, X. Y. Fan, Y. H. Lou, R. L. Cheng, and C. X. Zhang.** 2012. *Bombyx mori* nucleopolyhedrovirus ORF54, a viral desmoplakin gene, is associated with the infectivity of budded virions. *Arch. Virol.* 157:1241-51.
31. **Guo, Z. J., L. H. Qiu, S. H. An, Q. Yao, E. Y. Park, K. P. Chen, and C. X. Zhang.** 2010. Open reading frame 60 of the *Bombyx mori* nucleopolyhedrovirus plays a role in budded virus production. *Virus Res* 151:185-191.
33. **Shen, H., and K. Chen.** 2012. BM61 of *Bombyx mori* nucleopolyhedrovirus: its involvement in the egress of nucleocapsids from the nucleus. *FEBS letters* 586:990-995.
34. **Vanarsdall, A. L., K. Okano, and G. F. Rohrmann.** 2004. Characterization of a baculovirus with a deletion of *vlf-1*. *Virology* 326:191-201.
35. **Li, Y., J. Wang, R. Deng, Q. Zhang, K. Yang, and X. Wang.** 2005. *vlf-1* deletion brought AcMNPV to defect in nucleocapsid formation. *Virus genes* 31:275-284.
35. **Olszewski, J., and L. K. Miller.** 1997. A role for baculovirus GP41 in budded virus production. *Virology*, 1997. 233:292-301.
37. **Ge, J. Q., Z. N. Yang, X. D. Tang, H. J. Xu, J. Hong, J. G. Chen, and C. X. Zhang.** 2008. Characterization of a nucleopolyhedrovirus with a deletion of the baculovirus core gene Bm67. *J. Gen. Virol.* 89:766-774.
38. **Wu, W., and A. L. Passarelli.** 2010. *Autographa californica* multiple nucleopolyhedrovirus Ac92 (ORF92, P33) is required for budded virus production and multiply enveloped occlusion-derived virus formation. *J. Virol.* 84:12351-12361.
39. **Nie, Y., M. Fang, and D. A. Theilmann.** 2011. *Autographa californica* multiple nucleopolyhedrovirus core gene *ac92* (p33) is required for efficient budded virus production. *Virology* 409:38-45.
40. **Chen, L., X. Hu, X. Xiang, S. Yu, R. Yang, and X. Wu.** 2012. *Autographa californica* multiple nucleopolyhedrovirus *odv-e25* (Ac94) is required for budded virus infectivity and occlusion-derived virus formation. *Arch. Virol.* 157:617-625.
41. **Huang, H., M. Wang, F. Deng, H. Wang, and Z. Hu.** 2012. ORF85 of HearNPV encodes the *per os* infectivity factor 4 (PIF4) and is essential for the formation of the PIF complex. *Virology* 427:217-223.
42. **Fang, M., Y. Nie, S. Harris, M. A. Erlandson, and D. A. Theilmann.** 2009. *Autographa californica* multiple nucleopolyhedrovirus core gene *ac96* encodes a *per os* infectivity factor (PIF-4). *J. Virol.* 83:12569-12578.
43. **Wu, W., T. Lin, L. Pan, M. Yu, Z. Li, Y. Pang, and K. Yang.** 2006. *Autographa californica* multiple nucleopolyhedrovirus nucleocapsid assembly is interrupted upon deletion of the 38K gene. *J. Virol.* 80:11475-11485.
44. **Wang, M., E. Tuladhar, S. Shen, H. Wang, M. M. van Oers, J. M. Vlak, and M.**

- Westenberg.** 2010. Specificity of baculovirus P6.9 basic DNA-binding proteins and critical role of the C terminus in virion formation. *J. Virol.* 84:8821-8828.
45. **Gandhi, K. M., T. Ohkawa, M. D. Welch, and L. E. Volkman.** 2012. Nuclear localization of actin requires AC102 in *Autographa californica* multiple nucleopolyhedrovirus-infected cells. *J. Gen. Virol.* 93:1795-1803.
46. **Yuan, M., W. Wu, C. Liu, Y. Wang, Z. Hu, K. Yang, and Y. Pang.** 2008. A highly conserved baculovirus gene p48 (ac103) is essential for BV production and ODV envelopment. *Virology* 379:87-96.
47. **Marek, M., O. W. Merten, L. Galibert, J. M. Vlak, and M. M. van Oers.** 2011. Baculovirus VP80 protein and the F-actin cytoskeleton interact and connect the viral replication factory with the nuclear periphery. *J. Virol.* 85:5350-5362.
48. **Tang, X. D., Y. P. Xu, L. L. Yu, G. J. Lang, C. H. Tian, J. F. Zhao, and C. X. Zhang.** 2008. Characterization of a *Bombyx mori* nucleopolyhedrovirus with Bmvp80 disruption. *Virus. Res.* 138:81-88.
49. **Lin, L., J. Wang, R. Deng, J. Ke, H. Wu, and X. Wang.** 2009. ac109 is required for the nucleocapsid assembly of *Autographa californica* multiple nucleopolyhedrovirus. *Virus. Res.* 144:130-135.
50. **Fang, M., Y. Nie, and D. A. Theilmann.** 2009. Deletion of the AcMNPV core gene ac109 results in budded virions that are non-infectious. *Virology* 389:66-74.
51. **Xiang, X., L. Chen, X. Hu, S. Yu, R. Yang, and X. Wu.** 2011. *Autographa californica* multiple nucleopolyhedrovirus odv-e66 is an essential gene required for oral infectivity. *Virus. Res.* 158:72-78.
52. **Ohkawa, T., J. O. Washburn, R. Sitapara, E. Sid, and L. E. Volkman.** 2005. Specific binding of *Autographa californica* M nucleopolyhedrovirus occlusion-derived virus to midgut cells of *Heliothis virescens* larvae is mediated by products of pif genes Ac119 and Ac022 but not by Ac115. *J. Virol.* 79:15258-15264.
53. **Luo, S., Y. Zhang, X. Xu, M. Westenberg, J. M. Vlak, H. Wang, Z. Hu, and F. Deng.** 2011. *Helicoverpa armigera* nucleopolyhedrovirus occlusion-derived virus-associated protein, HA100, affects oral infectivity in vivo but not virus replication in vitro. *J. Gen. Virol.* 92:1324-1331.
54. **Tomalski, M. D., R. Eldridge, and L. K. Miller.** 1991. A baculovirus homolog of a Cu/Zn superoxide dismutase gene. *Virology* 184:149-161.
55. **Clavijo, G., T. Williams, O. Simon, D. Munoz, M. Cerutti, M. Lopez-Ferber, and P. Caballero.** 2009. Mixtures of complete and pif1- and pif2-deficient genotypes are required for increased potency of an insect nucleopolyhedrovirus. *J. Virol.* 83:5127-5136.
56. **Detvisitsakun, C., E. L. Hutfless, M. F. Berretta, and A. L. Passarelli.** 2006. Analysis of a baculovirus lacking a functional viral fibroblast growth factor homolog. *Virology* 346:258-265.
57. **Katsuma, S., S. Horie, T. Daimon, M. Iwanaga, and T. Shimada.** 2006. In vivo and in vitro analyses of a *Bombyx mori* nucleopolyhedrovirus mutant lacking functional vfgf. *Virology* 355:62-70.
58. **Nie, Y., and D. A. Theilmann.** 2010. Deletion of AcMNPV AC16 and AC17 results in delayed viral gene expression in budded virus infected cells but not transfected cells.

Virology 404:168-179.

59. **Yang, Z., Xu, H., S. M. Thiem, Xu, Y., Ge, J., Tang, X., Tian, C., and C. X. Zhang.** 2009. *Bombyx mori* nucleopolyhedrovirus ORF9 is a gene involved in the budded virus production and infectivity. J. Gen. Virol. 90:162-169.
60. **Fang, M., Y. Nie, Q. Wang, F. Deng, R. Wang, H. Wang, J. M. Vlak, X. Chen, and Z. Hu.** 2006. Open reading frame 132 of *Helicoverpa armigera* nucleopolyhedrovirus encodes a functional per os infectivity factor (PIF-2). J. Gen. Virol. 87:2563-2569.
61. **Wang, M., Y. Tan, F. Yin, F. Deng, J. M. Vlak, Z. Hu, and H. Wang.** 2008. The F protein of *Helicoverpa armigera* single nucleopolyhedrovirus can be substituted functionally with its homologue from *Spodoptera exigua* multiple nucleopolyhedrovirus. J. Gen. Virol. 89:791-798.
62. **Wang, M., Y. Tan, F. Yin, F. Deng, J. M. Vlak, Z. Hu, and H. Wang.** 2008. The F-like protein Ac23 enhances the infectivity of the budded virus of gp64-null *Autographa californica* multinucleocapsid nucleopolyhedrovirus pseudotyped with baculovirus envelope fusion protein F. J. Virol. 82:9800-9804.
63. **Yu, I. L., D. Bray, Y. C. Lin, and O. Lung.** 2009. *Autographa californica* multiple nucleopolyhedrovirus ORF 23 null mutant produces occlusion-derived virions with fewer nucleocapsids. J. Gen. Virol. 90:1499-1504.
